# Supplementary material
Source: PubMed Central journal article supplement (PMC6588435)

**Data S1.** NMR spectra of compound 1, Related to STAR methods. (top) <sup>1</sup>H NMR of compound 1, (bottom) <sup>13</sup>C NMR spectrum of compound 1.

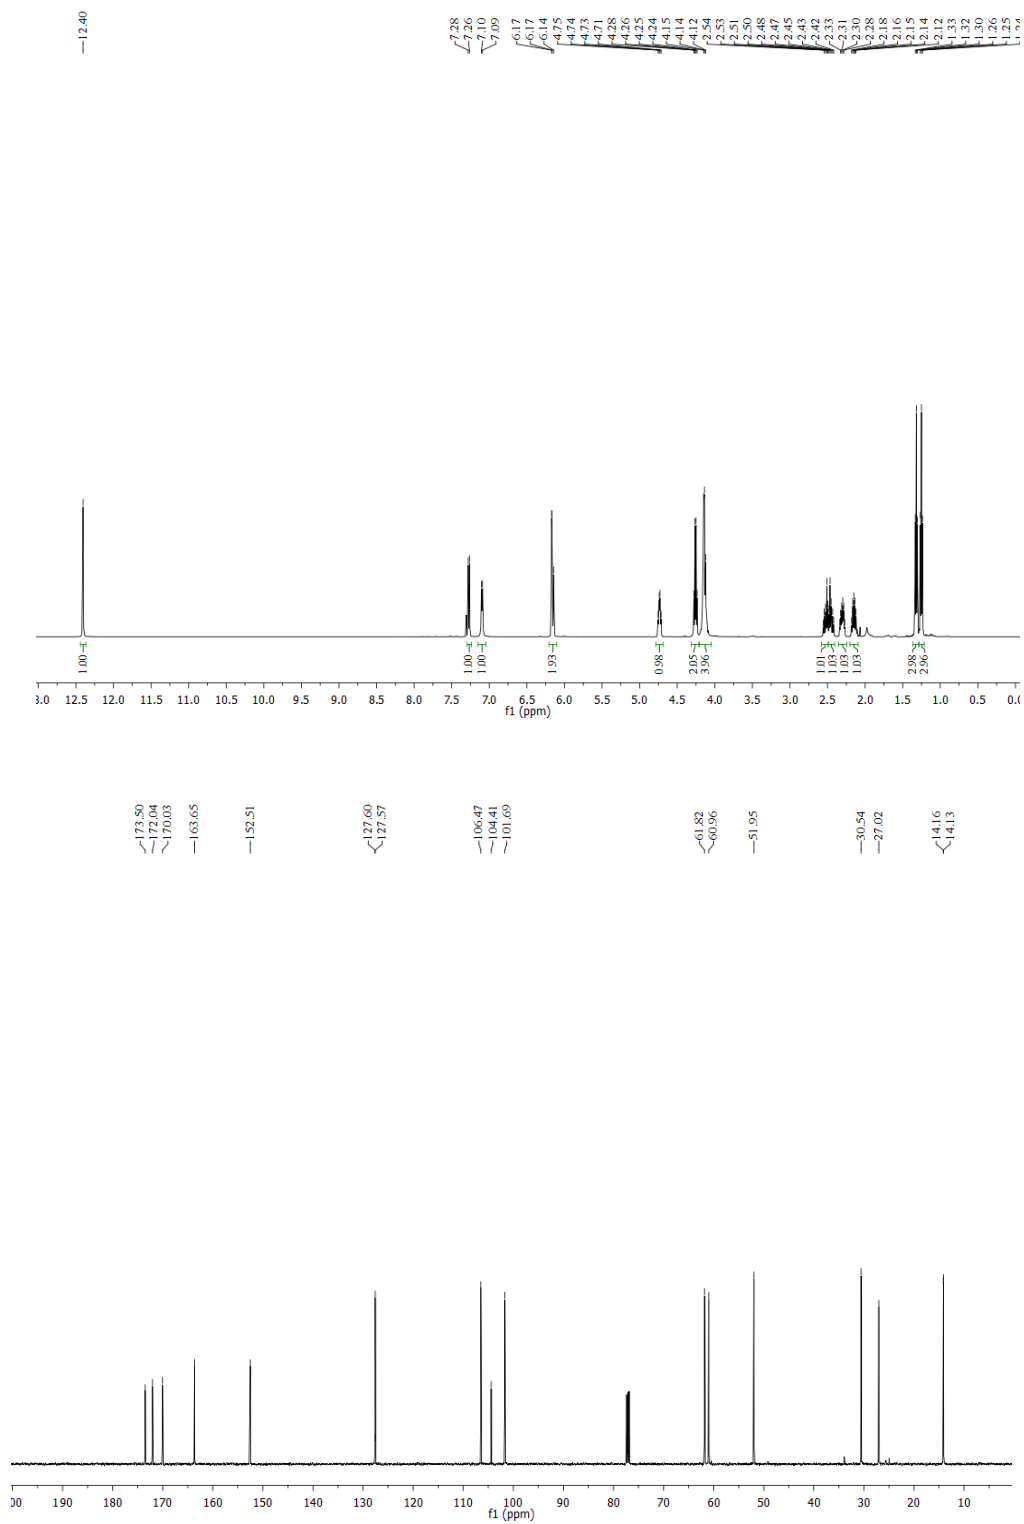

Supplement: NIHMS1522726-supplement-1.pdf [file NIHMS1522726-supplement-1.pdf]
