# Supplementary material
Source: PubMed Central journal article supplement (PMC6588435)

**Data S2.** NMR spectra of compound 3, Related to STAR methods. (top)  $^1\text{H}$  NMR of compound 3, (bottom)  $^{13}\text{C}$  NMR spectrum of compound 3.

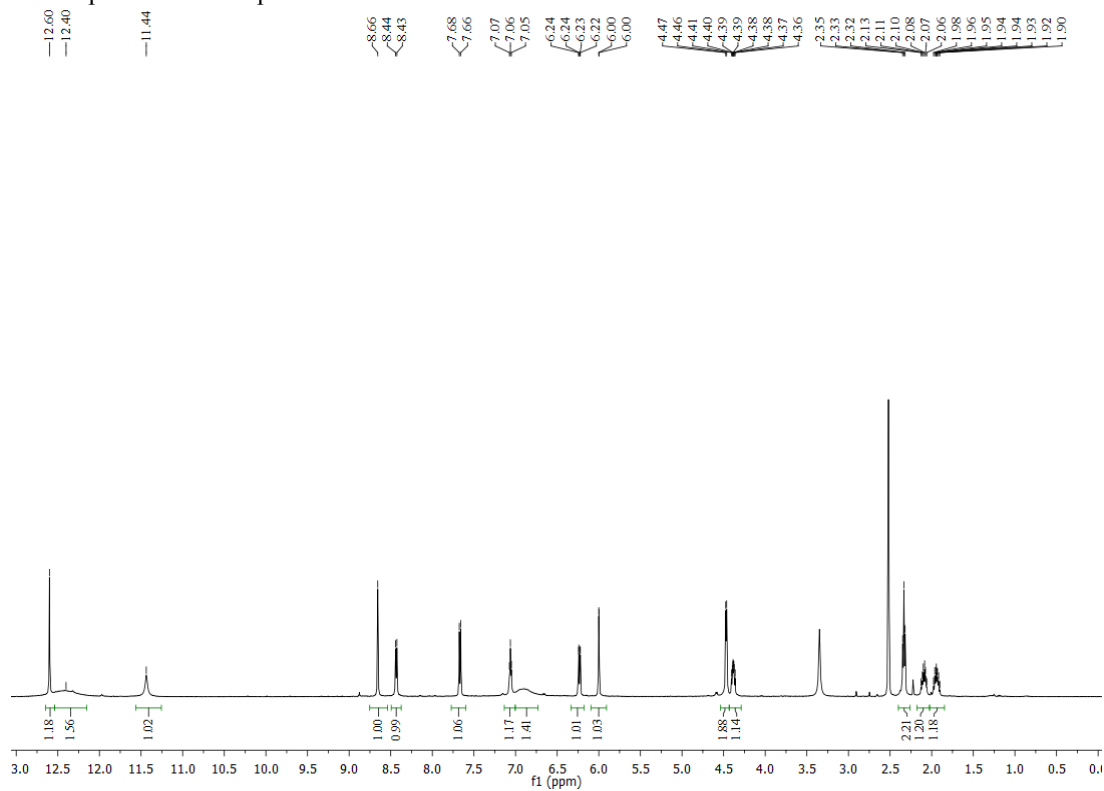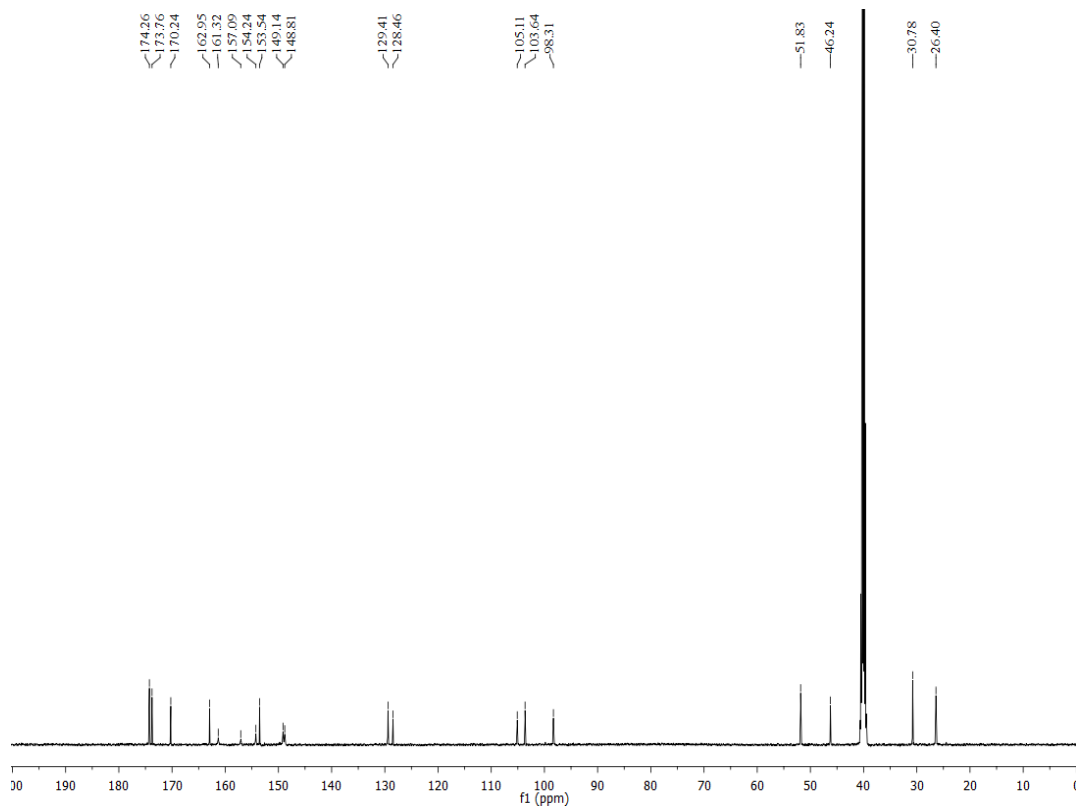

Supplement: NIHMS1522726-supplement-2.pdf [file NIHMS1522726-supplement-2.pdf]
